# Supplementary material for: Association of Preoperative High-Intensity Interval Training With Cardiorespiratory Fitness and Postoperative Outcomes Among Adults Undergoing Major Surgery: A Systematic Review and Meta-Analysis
Source: PubMed Central journal article supplement (PMC10314310; doi:10.1001/jamanetworkopen.2023.20527), 2023-06-30
Supplement: jamanetwopen-e2320527-s002.pdf [file jamanetwopen-e2320527-s002.pdf]

## Data Sharing Statement

Clifford. Association of Preoperative High-Intensity Interval Training With Cardiorespiratory Fitness and Postoperative Outcomes Among Adults Undergoing Major Surgery. *JAMA Network Open*. Published June 30, 2023. doi:10.1001/jamanetworkopen.2023.20527

### Data

**Data available:** Yes

**Data types:** Deidentified participant data

**How to access data:** upon request to the corresponding author

**When available:** With publication

### Supporting Documents

**Document types:** None

### Additional Information

**Who can access the data:** researchers whose proposed use of the data has been approved

**Types of analyses:** for any purpose

**Mechanisms of data availability:** after approval of a proposal

**Any additional restrictions:** none
